# Supplementary material for: The association between dietary factors and gestational hypertension and pre-eclampsia: a systematic review and meta-analysis of observational studies
Source: PubMed Central journal article supplement (PMC4192458; doi:10.1186/s12916-014-0157-7), 2014-09-22
Supplement: 12916_2014_157_MOESM1_ESM.pdf [file 12916_2014_157_MOESM1_ESM.pdf]

## Additional file 1: Additional Tables and Figures

**Table S1A.** Search strategy utilised for MEDLINE (years 1950 to May 2014)

| Search # | Search term <sup>a</sup>                                                                                                                                                                                                                                  | Results |
|----------|-----------------------------------------------------------------------------------------------------------------------------------------------------------------------------------------------------------------------------------------------------------|---------|
| 1        | exp Hypertension, Pregnancy-Induced/ OR gestational hypertension.tw. OR pregnancy induced hypertension.tw. OR pregnancy-induced hypertension.tw. OR exp Pre-Eclampsia/ OR preeclampsia.tw. OR pre-eclampsia.tw. OR hypertensi* disorder* of pregnancy.tw. | 25,239  |
| 2        | exp Diet/ OR diet*.tw. OR nutri*.tw. OR exp Food/ OR food.tw. OR exp Vitamins/ OR vitamin*.tw.                                                                                                                                                            | 662,398 |
| 3        | 1 AND 2                                                                                                                                                                                                                                                   | 1,523   |

<sup>a</sup> All restricted to English language and human populations

**Table S1B.** Search strategy utilised for EMBASE (years 1966 to May 2014)

| Search # | Search term <sup>a</sup>                                                                                                                                                                                                    | Results |
|----------|-----------------------------------------------------------------------------------------------------------------------------------------------------------------------------------------------------------------------------|---------|
| 1        | pregnancy induced hypertension:ti,ab OR pregnancy-induced hypertension:ti,ab OR gestational hypertension:ti,ab OR preeclampsia/exp OR pre-eclampsia:ti,ab OR preeclampsia:ti,ab OR hypertensi* disorder* of pregnancy:ti,ab | 19,033  |
| 2        | diet/exp OR diet*:ti,ab OR nutrition/exp OR nutri*:ti,ab OR food/exp OR food:ti,ab OR vitamin/exp OR vitamin*:ti,ab                                                                                                         | 294,898 |
| 3        | 1 AND 2                                                                                                                                                                                                                     | 720     |

<sup>a</sup> All restricted to English language and human populations

**Table S2.** Selected characteristics of cases and non-cases in studies included in systematic review of the association between dietary factors and hypertensive disorders of pregnancy

| Study                                                            | Unit             | Gestational hypertension cases | Preeclampsia cases       | Non-cases    | P-value |
|------------------------------------------------------------------|------------------|--------------------------------|--------------------------|--------------|---------|
| <b>Maternal age, years - case-control studies</b>                |                  |                                |                          |              |         |
| Al MD, 1994                                                      | Mean (SEM)       |                                | 27.9 (0.54)              | 28.5 (0.35)  | ns      |
| Atkinson JO, 1998                                                | Mean (SD)        |                                | 25.6 (6.4)               | 24.8 (7.9)   | 0.098   |
| Duvekot EJ, 2002 <sup>a</sup>                                    | Median (SD)      |                                | 28 (1)                   | 28 (0.3)     |         |
| Frederick IO, 2005 <sup>a</sup>                                  | Mean (SEM)       |                                | 29.9 (0.5)               | 30.6 (0.3)   | ns      |
| Gulsen S, 2012                                                   | 15-19y, n (%)    |                                | 6 (6.5)                  | 4 (2.6)      | <0.0001 |
|                                                                  | 20-34y, n (%)    |                                | 60 (65.2)                | 136 (87.8)   |         |
|                                                                  | >35y, n (%)      |                                | 26 (28.3)                | 15 (9.7)     |         |
| Kazemian E, 2013                                                 | Mean (SD)        | 28.73 (6.04)                   |                          | 25.36 (4.84) | <0.001  |
| Marcoux S, 1991                                                  | Mean (SD)        | 26.2 (4.3)                     | 26.0 (4.8)               | 26.1 (4.2)   | ns      |
| Paknahad Z, 2008 <sup>a</sup>                                    | Mean (SE)        | 26.5 (0.89) <sup>c</sup>       | 26.5 (0.89) <sup>c</sup> | 24.6 (0.72)  | 0.1     |
| Reyes L, 2012 <sup>a</sup>                                       | Mean (SD)        |                                | 26.45 (7.22)             | 26.71 (7.21) | ns      |
| Richards DGD, 2014 <sup>a</sup>                                  | Mean (SD)        |                                | 24 (4.3)                 | 24 (4.4)     | 0.7     |
| Schiff E, 1996                                                   | Mean (SD)        |                                | 21.5 (5.4)               | 20.1 (4.4)   | ns      |
| Sharbaf FR, 2013                                                 | Mean (SD)        |                                | 28 (4.1)                 | 27 (5)       | 0.53    |
| Wei S-Q, 2009                                                    | Mean (SD)        |                                | 29.0 (5.2)               | 29.1 (5.3)   | 0.55    |
| Zhang C, 2002                                                    | Mean (SEM)       |                                | 30.1 (0.6)               | 31.8 (0.3)   |         |
| <b>Maternal age, years - cohort studies</b>                      |                  |                                |                          |              |         |
| Clausen T, 2001                                                  | Mean (SD)        |                                | 29.2 (4.9)               | 29.9 (4.5)   | 0.16    |
| Geraldo Lopes Ramos J, 2006                                      | Mean             | 26.1                           | Mild: 28.1               | 25.2         |         |
|                                                                  |                  |                                | Severe: 23.3             |              |         |
| Goodarzi Khoigani M, 2012                                        | Mean (SD)        |                                | 26.48 (4.21)             | 25.60 (4.44) | 0.33    |
| Longo-Mbenza B, 2008                                             | Mean (SD)        | 25.5 (7.2) <sup>c</sup>        | 25.5 (7.2) <sup>c</sup>  | 27.4 (6.4)   | ns      |
| Morris CD, 2001                                                  | <25y, n (%)      | 619 (83)                       | 273 (84)                 | 2744 (84)    | ns      |
|                                                                  | 25-30y, n (%)    | 91 (12)                        | 34 (10)                  | 335 (11)     |         |
|                                                                  | >30y, n (%)      | 37 (5)                         | 19 (6)                   | 162 (5)      |         |
| Oken E, 2007                                                     | <20y, %          | 3                              | 7                        | 3            |         |
|                                                                  | 20-40y, %        | 94                             | 87                       | 93           |         |
|                                                                  | >40y, %          | 3                              | 7                        | 4            |         |
| Olafsdottir AS, 2006                                             | Mean (SD)        | 29 (6)                         | 26 (4)                   | 28 (5)       | ns      |
| Ortega RM, 1999                                                  | Mean (SD)        | 26.2 (3.4)                     |                          | 27.0 (3.9)   | ns      |
| Rumbold AR, 2005                                                 | Mean (SD)        | 28 (5) <sup>c</sup>            | 28 (5) <sup>c</sup>      | 28 (5)       | ns      |
| Tande DL, 2013                                                   | Mean (SE)        | 25.3 (0.72) <sup>c</sup>       | 25.3 (0.72) <sup>c</sup> | 24.2 (0.62)  |         |
| <b>Gestational age at delivery, weeks - case-control studies</b> |                  |                                |                          |              |         |
| Al MD, 1994                                                      | Mean (SEM)       |                                | 39.0 (0.3)               | 40.0 (0.08)  | <0.005  |
| Duvekot EJ, 2002                                                 | Median (SD)      |                                | 35 (0.4)                 | 39 (0.3)     |         |
| <b>Gestational age at delivery, weeks - cohort studies</b>       |                  |                                |                          |              |         |
| Clausen T, 2001                                                  | Mean (SD)        |                                | 37.8 (3.4)               | 39.5 (1.7)   | <0.001  |
| Rumbold AR, 2005                                                 | Mean (SD)        | 38 (1) <sup>c</sup>            | 38 (1) <sup>c</sup>      | 39 (1)       | 0.03    |
| Tande DL, 2013                                                   | ≤38 weeks, n (%) | 8 (62.5) <sup>c</sup>          | 8 (62.5) <sup>c</sup>    | 18 (37.5)    |         |
|                                                                  | ≥39 weeks, n (%) | 5 (38.5) <sup>c</sup>          | 5 (38.5) <sup>c</sup>    | 30 (62.5)    |         |

**Table S2.** Continued

| Study                                                           | Unit             | Gestational hypertension cases | Preeclampsia cases         | Non-cases        | P-value          |
|-----------------------------------------------------------------|------------------|--------------------------------|----------------------------|------------------|------------------|
| <b>Body mass index, kg/m<sup>2</sup> - case-control studies</b> |                  |                                |                            |                  |                  |
| Gulsen S, 2012                                                  | Mean (SE)        |                                | 26.35 (0.55)               | 25.56 (0.91)     | <0.53            |
| Wei S-Q, 2009                                                   | Mean (SD)        |                                | 23.9 (6.1)                 | 22.6 (4.2)       | 0.13             |
| Frederick IO, 2005                                              | Mean (SEM)       |                                | 27.1 (0.5)                 | 22.9 (0.2)       | <0.05            |
| Kazemian E, 2013                                                | Mean (SD)        | 28.97 (6.31)                   |                            | 23.70 (4.64)     | <0.001           |
| Richards DGD, 2014                                              | Median (range)   |                                | 28.6 (18.8-52.5)           | 28.4 (17.9-51.5) | 0.9              |
| Marcoux S, 1991                                                 | Mean (SD)        | 23.1 (4.4)                     | 22.4 (3.8)                 | 21.0 (2.8)       | <0.05            |
| Paknahad Z, 2008                                                | Mean (SE)        | 25.65 (0.89) <sup>c</sup>      | 25.65 (0.89) <sup>c</sup>  | 23.6 (0.58)      | 0.05             |
| Reyes L, 2012                                                   | Mean (SD)        |                                | 27.92 (5.01)               | 26.68 (3.83)     | <0.001           |
| Zhang C, 2002                                                   | Mean (SEM)       |                                | 26.0 (0.7)                 | 22.5 (0.3)       |                  |
| <b>Body mass index, kg/m<sup>2</sup> - cohort studies</b>       |                  |                                |                            |                  |                  |
| Clausen T, 2001                                                 | Mean (SD)        |                                | 23.7 (4.3)                 | 22.9 (3.7)       | 0.04             |
| Geraldo Lopes Ramos J, 2006                                     | Mean             | 30.1                           | Mild: 30.0<br>Severe: 29.6 | 28.1             |                  |
| Goodarzi Khoigani M, 2012                                       | Mean (SD)        |                                | 25.30 (5.29)               | 23.42 (3.84)     | 0.02             |
| Longo-Mbenza B, 2008                                            | Mean (SD)        | 22.9 (2.1) <sup>c</sup>        | 22.9 (2.1) <sup>c</sup>    | 22.7 (2)         | ns               |
| Morris CD, 2001                                                 | <19.8, n (%)     | 65 (9)                         | 18 (5)                     | 331 (10)         | <0.0001          |
|                                                                 | 19.8-25.9, n (%) | 317 (42)                       | 142 (44)                   | 1794 (55)        |                  |
|                                                                 | 26-35, n (%)     | 269 (36)                       | 118 (36)                   | 896 (28)         |                  |
|                                                                 | >35, n (%)       | 96 (13)                        | 48 (15)                    | 216 (7)          |                  |
| Oken E, 2007                                                    | <25, %           | 48                             | 37                         | 67               |                  |
|                                                                 | 25-30, %         | 29                             | 27                         | 21               |                  |
|                                                                 | >30, %           | 23                             | 36                         | 12               |                  |
| Olafsdottir AS, 2006                                            | Mean (SD)        | 28.7 (5.2)                     | 26.4 (4.4)                 | 24.4 (4.1)       | <0.001<br>for GH |
| Ortega RM, 1999                                                 | Mean (SD)        | 21.6 (0.9)                     |                            | 21.9 (2.4)       | ns               |
| Rumbold AR, 2005                                                | <25, n (%)       | 6 (19) <sup>c</sup>            | 6 (19) <sup>c</sup>        | 102 (55)         | <0.0001          |
|                                                                 | 25-30, n (%)     | 10 (31) <sup>c</sup>           | 10 (31) <sup>c</sup>       | 50 (27)          |                  |
|                                                                 | >30, n (%)       | 16 (50) <sup>c</sup>           | 16 (50) <sup>c</sup>       | 32 (17)          |                  |
| <b>Nulliparous - case-control studies</b>                       |                  |                                |                            |                  |                  |
| Al MD, 1994 <sup>b</sup>                                        | n (%)            |                                | 135 (86.5)                 | 45 (86.5)        | ns               |
| Atkinson JO, 1998                                               | n (%)            |                                | 96 (53.3)                  | 76 (39.2)        | 0.008            |
| Frederick IO, 2005 <sup>b</sup>                                 | n (%)            |                                | 123 (71.5)                 | 182 (53.7)       | <0.05            |
| Kesmodel U, 1997                                                | n (%)            | 77 (62.6)                      | 24 (72.7)                  | 109 (56.2)       |                  |
| Zhang C, 2002                                                   | n (%)            |                                | 49 (45.0)                  | 91 (35.1)        |                  |
| <b>Nulliparous - cohort studies</b>                             |                  |                                |                            |                  |                  |
| Clausen T, 2001                                                 | n (%)            |                                | 63 (74.1)                  | 1560 (51.2)      | <0.001           |
| Oken E, 2007                                                    | %                | 66                             | 73                         | 47               |                  |
| Olafsdottir AS, 2006                                            | %                | 57                             | 79                         | 47               | <0.05<br>for PE  |
| <b>Birth weight, grams - case-control studies</b>               |                  |                                |                            |                  |                  |
| Al MD, 1994                                                     | Mean (SEM)       |                                | 2941 (99.5)                | 3290 (30.2)      | <0.001           |
| Sharbaf FR, 2013                                                | Mean (SD)        |                                | 2860 (1.0)                 | 3316 (5.1)       | 0.00             |
| Wei S-Q, 2009                                                   | Mean (SD)        |                                | 2126 (898)                 | 3224 (657)       | 0.0001           |

**Table S2.** Continued

| Study                                              | Unit      | Gestational hypertension cases | Preeclampsia cases         | Non-cases  | P-value |
|----------------------------------------------------|-----------|--------------------------------|----------------------------|------------|---------|
| <b><i>Birth weight, grams - cohort studies</i></b> |           |                                |                            |            |         |
| Clausen T, 2001                                    | Mean (SD) |                                | 3072 (932)                 | 3598 (535) | <0.001  |
| Geraldo Lopes Ramos J, 2006                        | Mean      | 3353                           | Mild: 2013<br>Severe: 2106 | 3158       |         |
| Longo-Mbenza B, 2008                               | Mean (SD) | 2341 (657) <sup>c</sup>        | 2341 (657) <sup>c</sup>    | 2817 (543) | <0.05   |
| Olafsdottir AS, 2006                               | Mean (SD) | 3888 (562)                     | 3602 (526)                 | 3779 (479) | ns      |
| Rumbold AR, 2005                                   | Mean (SD) | 3585 (598) <sup>c</sup>        | 3585 (598) <sup>c</sup>    | 3503 (482) | ns      |

GH, gestational hypertension; ns, not significant; PE, preeclampsia

<sup>a</sup> cases and controls matched for maternal age

<sup>b</sup> cases and controls matched for parity

<sup>c</sup> for gestational hypertension and/or preeclampsia

**Table S3.** Overview of diagnostic criteria for gestational hypertension and preeclampsia used in studies on dietary factors and hypertensive disorders of pregnancy

| Study                           | Diagnostic criteria                                                                                                                                                                                                                                                                                                                                                                                |
|---------------------------------|----------------------------------------------------------------------------------------------------------------------------------------------------------------------------------------------------------------------------------------------------------------------------------------------------------------------------------------------------------------------------------------------------|
| <b>Gestational hypertension</b> |                                                                                                                                                                                                                                                                                                                                                                                                    |
| Geraldo Lopes Ramos J, 2006     | Blood pressure (>140/90mmHg) <sup>a,b</sup>                                                                                                                                                                                                                                                                                                                                                        |
| Kazemian E, 2013                | Blood pressure $\geq$ 140/90mmHg on $\geq$ 2 occasions <sup>a,b</sup>                                                                                                                                                                                                                                                                                                                              |
| Kesmodel U, 1997                | Diastolic blood pressure >90mmHg                                                                                                                                                                                                                                                                                                                                                                   |
| Marcoux S, 1991                 | Diastolic blood pressure $\geq$ 90mmHg <sup>a,b</sup>                                                                                                                                                                                                                                                                                                                                              |
| Morris CD, 2001                 | Diastolic blood pressure $\geq$ 90mmHg on $\geq$ 2 occasions 4-168h apart                                                                                                                                                                                                                                                                                                                          |
| Oken E, 2007                    | Blood pressure >140/90mmHg on $\geq$ 2 occasions <sup>b</sup>                                                                                                                                                                                                                                                                                                                                      |
| Olafsdottir AS, 2006            | Blood pressure $\geq$ 140/90mmHg <sup>a,b</sup>                                                                                                                                                                                                                                                                                                                                                    |
| Ortega RM, 1999                 | Blood pressure >140/90 mmHg on $\geq$ 2 occasions 1 week apart <sup>a,b</sup>                                                                                                                                                                                                                                                                                                                      |
| Rifas-Shiman SL, 2009           | Blood pressure >140/90mmHg on $\geq$ 2 occasions <sup>a,b</sup>                                                                                                                                                                                                                                                                                                                                    |
| Rumbold AR, 2005                | Blood pressure $\geq$ 140/90mmHg on 2 occasions $\geq$ 4h apart <sup>a,b</sup>                                                                                                                                                                                                                                                                                                                     |
| Saftlas AF, 2010                | Blood pressure $\geq$ 140/90mmHg on $\geq$ 2 occasions $\geq$ 6h apart <sup>a,b</sup>                                                                                                                                                                                                                                                                                                              |
| Timmermans S, 2011              | Blood pressure $\geq$ 140/90mmHg on $\geq$ 2 occasions <sup>a,b</sup>                                                                                                                                                                                                                                                                                                                              |
| <b>Preeclampsia</b>             |                                                                                                                                                                                                                                                                                                                                                                                                    |
| Al MD, 1994                     | Blood pressure (increase during pregnancy of $\geq$ 25mmHg, or two consecutive measurements of $\geq$ 90mmHg or one of $\geq$ 110mmHg) and proteinuria ( $\geq$ 300mg/24h) <sup>a,b</sup>                                                                                                                                                                                                          |
| Borgen I, 2012                  | Blood pressure (>140/90mmHg) and proteinuria (>1+ on a dipstick $\geq$ 2 occasions) <sup>a,c</sup>                                                                                                                                                                                                                                                                                                 |
| Brantsæter AL, 2009             | Blood pressure (>140/90mmHg) and proteinuria (>1+ on a dipstick $\geq$ 2 occasions) <sup>a,c</sup>                                                                                                                                                                                                                                                                                                 |
| Brantsæter AL, 2011             | Blood pressure (>140/90mmHg) and proteinuria (>1+ on a dipstick $\geq$ 2 occasions) <sup>a,c</sup><br>Severe preeclampsia: blood pressure (>160/110mmHg) and proteinuria (>1+ on a dipstick $\geq$ 2 occasions) <sup>a,c</sup>                                                                                                                                                                     |
| Chavarro JE, 2011               | Blood pressure ( $\geq$ 140/90mmHg) and proteinuria ( $\geq$ 300mg/24h or $\geq$ 1+ on a dipstick) <sup>a</sup>                                                                                                                                                                                                                                                                                    |
| Clausen T, 2001                 | Blood pressure ( $\geq$ 140/90mmHg or increase in diastolic pressure of $\geq$ 15mmHg above first trimester values on 2 occasions $\geq$ 6h apart) and proteinuria (300mg/24h or $\geq$ +1 on a dipstick in $\geq$ 2 random urine samples taken $\geq$ 6h apart) <sup>a</sup><br>Early-onset preeclampsia: onset <37 weeks' gestation<br>Late-onset preeclampsia: onset $\geq$ 37 weeks' gestation |
| Duvekot EJ, 2002                | Blood pressure (rise of $\geq$ 30mmHg systolic or 15mmHg diastolic above first 20 weeks of pregnancy values) and proteinuria ( $\geq$ 100mg/dl or $\geq$ 2+ on a dipstick) <sup>a,b</sup>                                                                                                                                                                                                          |
| Frederick IO, 2005              | Blood pressure (sustained rise of 30mmHg diastolic or 15mmHg diastolic above first trimester values, or persistent ( $\geq$ 6 hours) blood pressure >140/90mmHg) and proteinuria ( $\geq$ 30mg/dl or 1+ on a dipstick on $\geq$ 2 random samples collected $\geq$ 4h apart) <sup>a</sup>                                                                                                           |

**Table S3.** Continued

| Study                       | Diagnostic criteria                                                                                                                                                                                                                                                                                                                                                                                   |
|-----------------------------|-------------------------------------------------------------------------------------------------------------------------------------------------------------------------------------------------------------------------------------------------------------------------------------------------------------------------------------------------------------------------------------------------------|
| Goodarzi Khoigani M, 2012   | Blood pressure ( $\geq 140/90$ mmHg) and proteinuria ( $\geq 300$ mg/24h) <sup>a</sup>                                                                                                                                                                                                                                                                                                                |
| Geraldo Lopes Ramos J, 2006 | Blood pressure ( $> 140/90$ mmHg) and proteinuria ( $\geq 300$ mg/24h or 30mg/dL or $\geq 1+$ on a dipstick) <sup>a,b</sup>                                                                                                                                                                                                                                                                           |
| Gulsen S, 2012              | Severe preeclampsia: blood pressure ( $> 180/110$ mmHg) and proteinuria ( $\geq 3000$ mg/24h or $\geq 3+$ on a dipstick) <sup>a,b</sup>                                                                                                                                                                                                                                                               |
| Haugen M, 2009              | Blood pressure ( $> 140/90$ mmHg) and proteinuria ( $> 100$ mg/dl or $> 300$ mg/24h) <sup>a,b</sup>                                                                                                                                                                                                                                                                                                   |
| Kesmodel U, 1997            | Blood pressure ( $> 140/90$ mmHg) and proteinuria ( $> 1+$ on a dipstick on $\geq 2$ occasions) <sup>a,c</sup>                                                                                                                                                                                                                                                                                        |
| Klemmensen AK, 2009         | Diastolic blood pressure $> 90$ mmHg and proteinuria ( $> 0.3$ g/l or $> +$ on a dipstick)                                                                                                                                                                                                                                                                                                            |
| Marcoux S, 1991             | Blood pressure ( $\geq 140/90$ mmHg on 2 occasions $\geq 6$ h apart) and proteinuria ( $\geq 300$ mg/24h or $\geq 1+$ on a dipstick on 2 occasions $\geq 4$ h apart) <sup>a,b</sup>                                                                                                                                                                                                                   |
| Morris CD, 2001             | Severe preeclampsia: blood pressure ( $\geq 160/110$ mmHg on 2 occasions $\geq 6$ h apart) and proteinuria ( $\geq 5000$ mg/24h or $\geq 3+$ on a dipstick on 2 occasions $\geq 4$ h apart) or oliguria, cerebral or visual disturbances, pulmonary edema or cyanosis, epigastric or upper right-quadrant pain, impaired liver function, thrombocytopenia, or fetal growth restriction <sup>a,b</sup> |
| Oken E, 2007                | Blood pressure (diastolic $\geq 90$ mmHg) and proteinuria ( $\geq 300$ mg/24h or $\geq 1$ g/L in 2 urine samples) <sup>a,b</sup>                                                                                                                                                                                                                                                                      |
| Olafsdottir AS, 2006        | Blood pressure (diastolic $\geq 90$ mmHg on $\geq 2$ occasions 4-168h apart) and proteinuria ( $\geq 300$ mg/24h, $\geq 1+$ on a dipstick in 2 random urine samples taken 4-168h apart, or $\geq 2+$ on a dipstick in a single sample or protein/creatinine ratio $\geq 0.35$ )                                                                                                                       |
| Qiu C, 2008                 | Blood pressure ( $> 140/90$ mmHg on $\geq 2$ occasions) and proteinuria ( $1+$ on a dipstick in $\geq 2$ urine samples or $> 2+$ on a dipstick in a single sample 4h-7days apart) <sup>a,c</sup>                                                                                                                                                                                                      |
| Reyes L, 2012               | Blood pressure ( $\geq 140/90$ mmHg) and proteinuria ( $\geq 300$ mg/24h, $\geq 1+$ on a dipstick) <sup>a,b</sup>                                                                                                                                                                                                                                                                                     |
| Richardson BE, 1995         | Blood pressure ( $\geq 140/90$ mmHg) and proteinuria ( $\geq 300$ mg/24h or $\geq 1+$ on a dipstick in $\geq 2$ random urine samples taken $\geq 4-6$ h apart) <sup>a,b</sup>                                                                                                                                                                                                                         |
| Rifas-Shiman SL, 2009       | Blood pressure ( $\geq 160/110$ mmHg on 1 occasion or $\geq 140/90$ mmHg on 2 occasions 4h apart) and proteinuria ( $\geq 300$ mg/24h, $\geq 2+$ on a dipstick) <sup>a, b</sup>                                                                                                                                                                                                                       |
|                             | Blood pressure ( $\geq 140/90$ mmHg $\geq 2$ occasions $\geq 6$ h apart) and albuminuria ( $1+$ on a dipstick) and/or edema <sup>b</sup>                                                                                                                                                                                                                                                              |
|                             | Blood pressure ( $> 140/90$ mmHg on $\geq 2$ occasions) and proteinuria ( $1+$ on a dipstick in $\geq 2$ urine samples or $> 2+$ on a dipstick in a single sample 4h-7days apart) <sup>a,c</sup>                                                                                                                                                                                                      |

**Table S3.** Continued

| Study                                           | Diagnostic criteria                                                                                                                                                                                                                                                                                                                                                                                                                                                                                    |
|-------------------------------------------------|--------------------------------------------------------------------------------------------------------------------------------------------------------------------------------------------------------------------------------------------------------------------------------------------------------------------------------------------------------------------------------------------------------------------------------------------------------------------------------------------------------|
| Rumbold AR, 2005                                | Blood pressure ( $\geq 140/90$ mmHg on 2 occasions $\geq 4$ h apart) and one or more of the following: proteinuria ( $\geq 300$ mg/24h or protein/creatinine ratio $\geq 30$ mg/mmol,) renal insufficiency (serum/plasma creatinine $\geq 0.09$ mmol/L or oliguria), liver disease, neurological problems, haematological disturbances or fetal growth restriction) <sup>a,b</sup>                                                                                                                     |
| Saftlas AF, 2010                                | Blood pressure ( $\geq 140/90$ mmHg on $\geq 2$ occasions $\geq 6$ h apart) and proteinuria ( $\geq 300$ mg/24h or $\geq 1+$ on a dipstick on $\geq 2$ occasions) <sup>a,b</sup>                                                                                                                                                                                                                                                                                                                       |
| Schiff E, 1996                                  | Blood pressure ( $\geq 145/95$ mmHg on $\geq 2$ occasions 6h apart) and proteinuria ( $\geq 500$ mg/24h or $\geq 2+$ on a dipstick) <sup>a,b</sup>                                                                                                                                                                                                                                                                                                                                                     |
| Sharbaf FR, 2013                                | Blood pressure ( $\geq 140/90$ mmHg on $\geq 2$ occasions $\geq 4$ h apart) and proteinuria ( $\geq 300$ mg/24h or $\geq 1+$ on a dipstick) <sup>a,b</sup>                                                                                                                                                                                                                                                                                                                                             |
| Skajaa K, 1991                                  | Blood pressure ( $\geq 140/95$ mmHg) and proteinuria ( $\geq 0.3$ g/l) <sup>a,b</sup>                                                                                                                                                                                                                                                                                                                                                                                                                  |
| Timmermans S, 2011                              | Blood pressure ( $\geq 140/90$ mmHg on $\geq 2$ occasions) and proteinuria ( $\geq 300$ mg/24h, $\geq 1+$ on a dipstick on 1 occasion, or $\geq 2+$ urine dipstick on $\geq 2$ occasion) <sup>a,b</sup>                                                                                                                                                                                                                                                                                                |
| Triche EW, 2008                                 | Blood pressure ( $\geq 140/90$ mmHg on $\geq 2$ occasions $\geq 6$ h apart) and proteinuria ( $\geq 30$ mg/dL, or $\geq 300$ mg/24h, or 1+ on a dipstick on $\geq 2$ samples collected $\geq 4$ h apart or $\geq 2+$ on a dipstick on $\geq 1$ sample near end of pregnancy, or 1+ on a dipstick on $\geq 1$ catheterized dipstick during delivery hospitalization) <sup>a,b</sup>                                                                                                                     |
| Wei S-Q, 2009                                   | Blood pressure ( $\geq 140/90$ mmHg on $\geq 2$ occasions $\geq 4$ h apart) and proteinuria ( $\geq 300$ mg/24h or $\geq 1+$ on a dipstick) <sup>a,b</sup><br>Severe preeclampsia: blood pressure ( $\geq 160/110$ mmHg on $\geq 2$ occasions $\geq 6$ h apart) and proteinuria ( $\geq 5000$ mg/24h or $\geq 3+$ on a dipstick) or oliguria, pulmonary edema or cyanosis, impairment of liver function, visual or cerebral disturbances, decreased platelet count, or intrauterine growth restriction |
| Zhang C, 2002                                   | Blood pressure (sustained rise of 30mmHg diastolic or 15mmHg diastolic above first trimester values, or persistent ( $\geq 6$ h) blood pressure $>140/90$ mmHg) and proteinuria ( $\geq 30$ mg/dl or 1+ on a dipstick on $\geq 2$ random samples collected $\geq 4$ h apart) <sup>a,b</sup>                                                                                                                                                                                                            |
| <b>Gestational hypertension or preeclampsia</b> |                                                                                                                                                                                                                                                                                                                                                                                                                                                                                                        |
| Longa-Mbenza B, 2008                            | Blood pressure (sustained rise of 30mmHg diastolic or 15mmHg diastolic above first trimester values, or persistent ( $\geq 6$ h) blood pressure $>140/90$ mmHg) with or without proteinuria ( $\geq 30$ mg/dl or 1+ on a dipstick on $\geq 2$ random samples collected $\geq 4$ h apart) <sup>a,b</sup>                                                                                                                                                                                                |
| Paknahad Z, 2008                                | Blood pressure $>140/90$ mmHg with or without proteinuria ( $>300$ mg/day) in the absence of urinary tract infection <sup>a,b</sup>                                                                                                                                                                                                                                                                                                                                                                    |
| Tande DL, 2013                                  | Blood pressure $\geq 140/90$ mmHg on 2 occasions $\geq 6$ h apart with or without proteinuria ( $>300$ mg/24h or 1+ on a dipstick) <sup>a,b</sup>                                                                                                                                                                                                                                                                                                                                                      |

<sup>a</sup> Age at onset  $>20$  weeks' gestation

<sup>b</sup> Women with pre-existing or chronic hypertension were excluded from analysis

<sup>c</sup> Women with chronic hypertension were excluded, but not if they developed proteinuria

**Table S4A.** Quality assessment of case-control studies on dietary factors and hypertensive disorders of pregnancy

| Study              | Selection       |                         |                   |                    | Compara-<br>bility | Exposure                                                           |                        |                                                     | Total score |
|--------------------|-----------------|-------------------------|-------------------|--------------------|--------------------|--------------------------------------------------------------------|------------------------|-----------------------------------------------------|-------------|
|                    | Case definition | Case representativeness | Control selection | Control definition |                    | Comparability of cases and controls on bases of design or analysis | Exposure ascertainment | Similar ascertainment method for cases and controls |             |
| Al MD, 1994        | A★              | A★                      | B                 | A★                 | -                  | D                                                                  | A★                     | B                                                   | 4           |
| Atkinson JO, 1998  | A★              | A★                      | B                 | A★                 | -                  | D                                                                  | A★                     | B                                                   | 4           |
| Duvekot EJ, 2002   | A★              | A★                      | B                 | A★                 | A★ B★              | D                                                                  | A★                     | B                                                   | 6           |
| Frederick IO, 2005 | A★              | A★                      | B                 | A★                 | A★ B★              | B★                                                                 | A★                     | A★                                                  | 8           |
| Gulsen S, 2012     | A★              | A★                      | B                 | A★                 | -                  | D                                                                  | A★                     | B                                                   | 4           |
| Kazemian E, 2013   | A★              | A★                      | B                 | A★                 | A★ B★              | B★                                                                 | A★                     | B                                                   | 7           |
| Kesmodel U, 1997   | A★              | A★                      | A★                | A★                 | -                  | D                                                                  | A★                     | B                                                   | 5           |
| Marcoux S, 1991    | A★              | A★                      | B                 | B                  | -                  | D                                                                  | A★                     | B                                                   | 3           |
| Paknahad Z, 2008   | A★              | A★                      | B                 | A★                 | -                  | B★                                                                 | A★                     | B                                                   | 5           |
| Reyes L, 2012      | A★              | A★                      | A★                | A★                 | -                  | B★                                                                 | A★                     | B                                                   | 6           |
| Richards DGD, 2014 | A★              | A★                      | B                 | A★                 | -                  | D                                                                  | A★                     | A★                                                  | 5           |
| Schiff E, 1996     | A★              | A★                      | A★                | A★                 | -                  | D                                                                  | A★                     | B                                                   | 5           |
| Sharbaf FR, 2013   | A★              | A★                      | B                 | A★                 | -                  | D                                                                  | A★                     | B                                                   | 4           |
| Wei S-Q, 2009      | A★              | A★                      | B                 | A★                 | A★ B★              | D                                                                  | A★                     | B                                                   | 6           |
| Zhang C, 2002      | A★              | A★                      | B                 | A★                 | A★ B★              | B★                                                                 | A★                     | A★                                                  | 8           |



**Table S4B.** Quality assessment of cohort studies on dietary factors and hypertensive disorders of pregnancy

| Study                       | Selection                               |                                    |                              |                                          | Compara-<br>bility                                                       | Outcome            |                                 |                               | Total score |
|-----------------------------|-----------------------------------------|------------------------------------|------------------------------|------------------------------------------|--------------------------------------------------------------------------|--------------------|---------------------------------|-------------------------------|-------------|
|                             | Representativeness of<br>exposed cohort | Selection of non-exposed<br>cohort | Ascertainment of<br>exposure | Outcome not present at<br>start of study | Comparability of cases<br>and controls on bases of<br>design or analysis | Outcome assessment | Adequate during of<br>follow-up | Adequacy of follow-up<br>rate |             |
| Borgen I, 2012              | B★                                      | A★                                 | B★                           | A★                                       | A★ B★                                                                    | B★                 | A★                              | B★                            | 9           |
| Brantsæter AL, 2009         | B★                                      | A★                                 | B★                           | A★                                       | A★ B★                                                                    | B★                 | A★                              | B★                            | 9           |
| Brantsæter AL, 2011         | B★                                      | A★                                 | B★                           | A★                                       | A★ B★                                                                    | B★                 | A★                              | B★                            | 9           |
| Chavarro JE, 2011           | B★                                      | A★                                 | B★                           | B                                        | -                                                                        | B★                 | A★                              | B★                            | 6           |
| Clausen T, 2001             | B★                                      | A★                                 | B★                           | B                                        | -                                                                        | A★                 | A★                              | B★                            | 6           |
| Geraldo Lopes Ramos J, 2006 | D                                       | A★                                 | B★                           | B                                        | -                                                                        | A★                 | A★                              | B★                            | 5           |
| Goodarzi Khoigani M, 2012   | B★                                      | A★                                 | B★                           | A★                                       | -                                                                        | B★                 | A★                              | B★                            | 7           |
| Haugen M, 2009              | B★                                      | A★                                 | B★                           | A★                                       | A★ B★                                                                    | B★                 | A★                              | B★                            | 9           |
| Klemmensen AK, 2009         | B★                                      | A★                                 | B★                           | B                                        | A★ B★                                                                    | B★                 | A★                              | B★                            | 8           |
| Longo-Mbenza B, 2008        | C                                       | A★                                 | C                            | A★                                       | -                                                                        | A★                 | A★                              | B★                            | 5           |
| Morris CD, 2001             | C                                       | A★                                 | B★                           | A★                                       | -                                                                        | A★                 | A★                              | B★                            | 6           |
| Oken E, 2007                | C                                       | A★                                 | B★                           | A★                                       | A★ B★                                                                    | B★                 | A★                              | B★                            | 8           |
| Olafsdottir AS, 2006        | D                                       | A★                                 | B★                           | A★                                       | -                                                                        | B★                 | A★                              | B★                            | 6           |
| Ortega RM, 1999             | D                                       | A★                                 | B★                           | B                                        | -                                                                        | A★                 | A★                              | B★                            | 5           |
| Qiu C, 2008                 | D                                       | A★                                 | B★                           | A★                                       | A★ B★                                                                    | A★                 | A★                              | D                             | 7           |

**Table S4B.** Continued

| Study                 | Selection                               |                                    |                              |                                          | Compara-<br>bility                                                       | Outcome            |                                 |                               | Total score |
|-----------------------|-----------------------------------------|------------------------------------|------------------------------|------------------------------------------|--------------------------------------------------------------------------|--------------------|---------------------------------|-------------------------------|-------------|
|                       | Representativeness of<br>exposed cohort | Selection of non-exposed<br>cohort | Ascertainment of<br>exposure | Outcome not present at<br>start of study | Comparability of cases<br>and controls on bases of<br>design or analysis | Outcome assessment | Adequate during of<br>follow-up | Adequacy of follow-up<br>rate |             |
| Richardson BE, 1995   | D                                       | A★                                 | B★                           | B                                        | -                                                                        | B★                 | A★                              | D                             | 4           |
| Rifas-Shiman SL, 2009 | D                                       | A★                                 | B★                           | B                                        | A★ B★                                                                    | A★                 | A★                              | B★                            | 7           |
| Rumbold AR, 2005      | C                                       | A★                                 | B★                           | B                                        | A★ B★                                                                    | A★                 | A★                              | D                             | 6           |
| Saftlas AF, 2010      | D                                       | A★                                 | B★                           | A★                                       | A★ B★                                                                    | B★                 | A★                              | B★                            | 8           |
| Skajaa K, 1991        | D                                       | A★                                 | B★                           | B                                        | A★ B★                                                                    | B★                 | A★                              | B★                            | 7           |
| Tande DL, 2013        | C                                       | A★                                 | C                            | A★                                       | -                                                                        | B★                 | A★                              | B★                            | 5           |
| Timmermans S, 2011    | B★                                      | A★                                 | B★                           | A★                                       | A★ B★                                                                    | B★                 | A★                              | D                             | 8           |
| Triche EW, 2008       | B★                                      | A★                                 | B★                           | A★                                       | A★ B★                                                                    | B★                 | A★                              | B★                            | 9           |

## Newcastle – Ottawa quality assessment scale

### Case-control studies

Note: A study can be awarded a maximum of one star for each numbered item within the Selection and Exposure categories. A maximum of two stars can be given for Comparability.

#### Selection

- 1) Is the case definition adequate?
  - a) yes, with independent validation ★
  - b) yes, e.g. record linkage or based on self-reports
  - c) no description
- 2) Representativeness of the cases
  - a) consecutive or obviously representative series of cases ★
  - b) potential for selection biases or not stated
- 3) Selection of Controls
  - a) community controls ★
  - b) hospital controls
  - c) no description
- 4) Definition of Controls
  - a) no history of disease (endpoint) ★
  - b) no description of source

#### Comparability

- 1) Comparability of cases and controls on the basis of the design or analysis
  - a) study controls for *maternal age, hypertension prior to pregnancy and parity* ★
  - b) study controls for any additional factor ★ (*e.g. body mass index, smoking, socioeconomic factors, family history of hypertension or HDP, physical activity, dietary factors*)

#### Exposure

- 1) Ascertainment of exposure
  - a) secure record (*e.g. hospital record*) ★
  - b) structured interview/*dietary recall/diet history/validated food frequency questionnaire* where blind to case/control status ★
  - c) interview/*dietary recall/diet history/validated food frequency questionnaire* not blinded to case/control status
  - d) written self-report or medical record only (*e.g. non-validated food frequency questionnaire*)
  - e) no description
- 2) Same method of ascertainment for cases and controls
  - a) yes ★
  - b) no
- 3) Non-Response rate
  - a) same rate for both groups ★
  - b) non respondents described
  - c) rate different and no designation

## Cohort studies

Note: A study can be awarded a maximum of one star for each numbered item within the Selection and Outcome categories. A maximum of two stars can be given for Comparability

### Selection

#### 1) Representativeness of the exposed cohort

- a) truly representative of the average *reproductive-aged women* in the community ★
- b) somewhat representative of the average *reproductive-aged women* in the community ★
- c) selected group of users *e.g. only certain socio-economic groups/areas*
- d) no description of the derivation of the cohort

#### 2) Selection of the non-exposed cohort

- a) drawn from the same community as the exposed cohort ★
- b) drawn from a different source
- c) no description of the derivation of the non-exposed cohort

#### 3) Ascertainment of exposure

- a) secure record (*e.g. hospital record*) ★
- b) structured interview/*dietary recall/diet history/validated food frequency questionnaire* ★
- c) written self-report (*e.g. non-validated food frequency questionnaire*)
- d) no description

#### 4) Demonstration that outcome of interest was not present at start of study

- a) yes ★
- b) no

### Comparability

#### 1) Comparability of cohorts on the basis of the design or analysis

- a) study controls for *maternal age, hypertension prior to pregnancy and parity* ★
- b) study controls for any additional factor ★ (*e.g. body mass index, smoking, socioeconomic factors, family history of hypertension or HDP, physical activity, dietary factors*)

### Outcome

#### 1) Assessment of outcome

- a) independent blind assessment ★
- b) record linkage ★
- c) self-report
- d) no description

#### 2) Was follow-up long enough for outcomes to occur

- a) yes, *if followed-up until delivery* ★
- b) no

#### 3) Adequacy of follow up of cohorts

- a) complete follow up - all subjects accounted for ★
- b) subjects lost to follow up unlikely to introduce bias - small number lost  $\leq 20\%$  follow up, or description provided of those lost ★
- c) follow up rate  $< 80\%$  or no description of those lost
- d) no statement

**Table S5.** Overview of confounding factors used in multivariable analysis in studies on dietary factors and hypertensive disorders of pregnancy

| Study               | Socio-demographic factors |           |                                    |                      |                                    |              |                                   | Reproductive factors |                 | Lifestyle factors   |                    |                   |     |        | Dietary factors         |         |                   |                     |                        |                               |
|---------------------|---------------------------|-----------|------------------------------------|----------------------|------------------------------------|--------------|-----------------------------------|----------------------|-----------------|---------------------|--------------------|-------------------|-----|--------|-------------------------|---------|-------------------|---------------------|------------------------|-------------------------------|
|                     | Maternal age              | Ethnicity | Socio-economic status <sup>a</sup> | Family history of HT | HT prior to pregnancy <sup>b</sup> | Previous HDP | Blood pressure in early pregnancy | Season of childbirth | Gestational age | Parity <sup>c</sup> | Pregnancy interval | Pre-pregnancy BMI | BMI | Height | Gestational weight gain | Smoking | Physical activity | Total energy intake | Dietary supplement use | Other nutrients/foods/pattern |
| Atkinson JO, 1998   | ✓                         |           |                                    |                      | NA                                 |              |                                   |                      |                 |                     |                    |                   |     |        |                         |         |                   |                     |                        |                               |
| Borgen I, 2012      | ✓                         |           | ✓                                  |                      | NA                                 |              |                                   |                      | NA              |                     | ✓                  |                   | ✓   |        | ✓                       | ✓       | ✓                 | ✓                   |                        | ✓                             |
| Brantsæter AL, 2009 | ✓                         |           | ✓                                  |                      | ✓                                  |              |                                   |                      | NA              |                     | ✓                  |                   | ✓   |        | ✓                       |         | ✓                 | ✓                   | ✓                      | ✓                             |
| Brantsæter AL, 2011 | ✓                         |           | ✓                                  |                      | NA                                 |              |                                   |                      | NA              |                     | ✓                  |                   | ✓   |        | ✓                       |         | ✓                 | ✓                   |                        | ✓                             |
| Chavarro JE, 2011   | ✓                         |           | ✓                                  |                      |                                    |              |                                   |                      | ✓               |                     | ✓                  |                   | ✓   |        | ✓                       |         | ✓                 | ✓                   |                        | ✓                             |
| Clausen T, 2001     | ✓                         |           |                                    |                      |                                    |              | ✓                                 |                      | ✓               |                     |                    | ✓                 |     |        | ✓                       |         | ✓                 | ✓                   |                        | ✓                             |
| Duvekot EJ, 2002    | ✓                         |           |                                    | ✓                    | NA                                 |              |                                   |                      | NA              |                     |                    | ✓                 |     |        | ✓                       |         | ✓                 |                     |                        | ✓                             |
| Frederick IO, 2005  | ✓                         |           | ✓                                  |                      |                                    |              |                                   |                      | ✓               |                     | ✓                  |                   |     |        |                         |         | ✓                 | ✓                   |                        | ✓                             |
| Haugen M, 2009      | ✓                         |           | ✓                                  |                      | NA                                 |              |                                   | ✓                    | NA              |                     | ✓                  |                   | ✓   |        | ✓                       |         | ✓                 |                     |                        | ✓                             |
| Kazemian E, 2013    | ✓                         |           |                                    | ✓                    | NA                                 | ✓            |                                   |                      | ✓               | ✓                   | ✓                  |                   |     | ✓      |                         |         | ✓                 | ✓                   |                        | ✓                             |
| Kesmodel U, 1997    |                           |           | ✓                                  |                      |                                    |              |                                   |                      | ✓               |                     | ✓                  |                   | ✓   |        | ✓                       |         | ✓                 |                     |                        | ✓                             |
| Klemmensen AK, 2009 | ✓                         |           | ✓                                  |                      | NA                                 |              |                                   |                      | ✓               |                     | ✓                  |                   | ✓   |        | ✓                       |         | ✓                 |                     |                        | ✓                             |
| Marcoux S, 1991     | ✓                         |           | ✓                                  |                      | NA                                 |              | ✓                                 |                      |                 |                     |                    | ✓                 |     |        | ✓                       | ✓       |                   |                     |                        | ✓                             |
| Morris CD, 2001     | ✓                         | ✓         |                                    |                      |                                    |              |                                   | ✓                    | NA              |                     |                    | ✓                 |     |        | ✓                       |         | ✓                 |                     |                        | ✓                             |

**Table S5.** Continued

| Study                 | Socio-demographic factors |           |                                    |                      |                                    |              |                                   | Reproductive factors | Lifestyle factors |                     |                    |                   |     | Dietary factors |                         |         |                   |                     |                        |                               |
|-----------------------|---------------------------|-----------|------------------------------------|----------------------|------------------------------------|--------------|-----------------------------------|----------------------|-------------------|---------------------|--------------------|-------------------|-----|-----------------|-------------------------|---------|-------------------|---------------------|------------------------|-------------------------------|
|                       | Maternal age              | Ethnicity | Socio-economic status <sup>a</sup> | Family history of HT | HT prior to pregnancy <sup>b</sup> | Previous HDP | Blood pressure in early pregnancy | Season of childbirth | Gestational age   | Parity <sup>c</sup> | Pregnancy interval | Pre-pregnancy BMI | BMI | Height          | Gestational weight gain | Smoking | Physical activity | Total energy intake | Dietary supplement use | Other nutrients/foods/pattern |
| Oken E, 2007          | ✓                         | ✓         | ✓                                  |                      | ✓                                  |              |                                   |                      |                   |                     | ✓                  | ✓                 |     |                 |                         |         |                   | ✓                   |                        |                               |
| Qiu C, 2008           | ✓                         | ✓         |                                    |                      | NA                                 |              |                                   |                      |                   |                     | ✓                  | ✓                 |     |                 |                         |         |                   | ✓                   |                        | ✓                             |
| Reyes L, 2012         | ✓                         |           | ✓                                  |                      | NA                                 |              |                                   |                      |                   |                     |                    | ✓                 |     |                 |                         |         |                   |                     |                        |                               |
| Richardson BE, 1995   |                           |           |                                    |                      | NA                                 | ✓            |                                   |                      |                   |                     | ✓                  | ✓                 |     | ✓               |                         |         |                   |                     |                        |                               |
| Rifas-Shiman SL, 2009 | ✓                         | ✓         | ✓                                  |                      | NA                                 |              |                                   |                      |                   |                     | ✓                  | ✓                 |     |                 |                         |         |                   |                     |                        |                               |
| Rumbold AR, 2005      | ✓                         | ✓         | ✓                                  | ✓                    | NA                                 | ✓            |                                   |                      |                   |                     | ✓                  | ✓                 |     |                 | ✓                       |         |                   |                     |                        |                               |
| Saftlas AF, 2010      |                           |           |                                    |                      | NA                                 |              |                                   |                      |                   |                     | ✓                  | ✓                 |     |                 |                         |         |                   |                     |                        |                               |
| Skajaa K, 1991        | ✓                         |           |                                    |                      | NA                                 |              |                                   | ✓                    | ✓                 |                     | ✓                  |                   | ✓   | ✓               | ✓                       | ✓       |                   |                     |                        |                               |
| Timmermans S, 2011    | ✓                         | NA        | ✓                                  |                      | NA                                 |              |                                   |                      | ✓                 |                     | ✓                  | ✓                 |     |                 | ✓                       |         |                   |                     |                        | ✓                             |
| Triche EW, 2008       | ✓                         | ✓         | ✓                                  |                      | NA                                 |              |                                   |                      | ✓                 |                     | ✓                  | ✓                 |     |                 | ✓                       |         |                   |                     |                        |                               |
| Wei S-Q, 2009         | ✓                         |           | ✓                                  |                      | NA                                 |              |                                   |                      | NA                |                     |                    | ✓                 |     |                 | ✓                       |         |                   |                     |                        |                               |
| Zhang C, 2002         | ✓                         | ✓         | ✓                                  |                      | NA                                 |              |                                   |                      | ✓                 |                     | ✓                  |                   |     |                 | ✓                       |         |                   | ✓                   |                        |                               |

BMI, body mass index; HDP, hypertensive disorders of pregnancy; HT, hypertension; NA, not applicable

<sup>a</sup> Education, occupation or income

<sup>b</sup> NA if women with chronic hypertension were excluded from the analysis

<sup>c</sup> NA if the study includes nulliparous women only

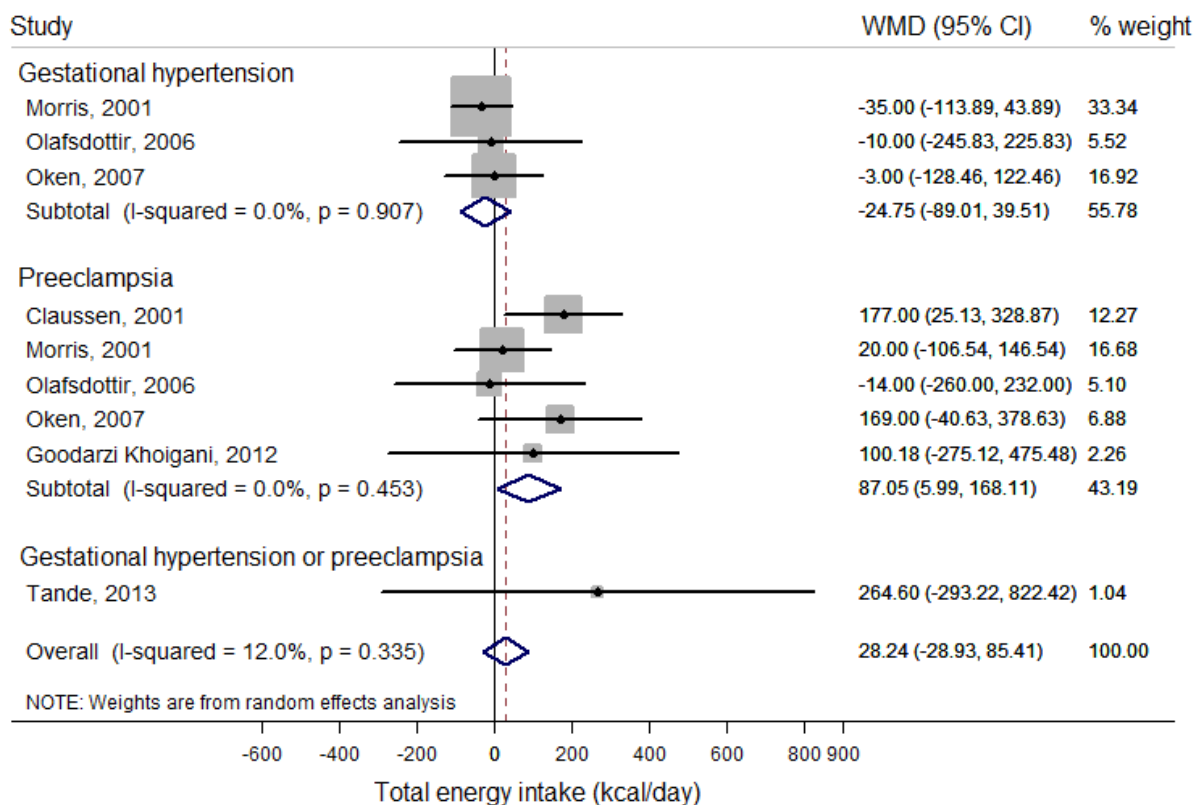

**Figure S1.** Difference of unadjusted total energy intake (kcal/day) between cases (gestational hypertension, preeclampsia and gestational hypertension or preeclampsia) and non-cases (reference) reported in cohort studies.

Meta-analysis of 9 studies from 6 articles with data from 10,302 pregnant women and 896 gestational hypertension, 512 preeclampsia, and 13 gestational hypertension or preeclampsia cases). For each study, the centre of each square indicates the weighted mean difference (WMD) and the horizontal line indicates the 95% confidence interval; the area of the square is proportional to the weight that the individual study contributes to the overall pooled mean difference; the diamonds are pooled mean differences (for each outcome and overall).
